# Supplementary material for: MALDI-TOF MS: optimization for future uses in entomological surveillance and identification of mosquitoes from New Caledonia
Source: PubMed Central journal article supplement (PMC7372833; doi:10.1186/s13071-020-04234-8), 2020-07-20

**Additional file 1: Figure S1.** MALDI-TOF MS spectra of fresh mosquitoes and those harvested from BG-sentinel at each same point. Spectra from three specimens per point are shown on each graphic: fresh mosquitoes (**a**); mosquitoes harvested at 24 h (**b**); mosquitoes harvested at 48 h (**c**); mosquitoes harvested at 72 h (**d**); mosquitoes harvested at 96 h (**e**); and mosquitoes harvested at 168 h (**f**). X-axis corresponds to mass to charge ration (M/z). Y-axis corresponds to relative intensity of signal. Colours illustrate each individual for each group. *Abbreviation:* AU, arbitrary units.

**A**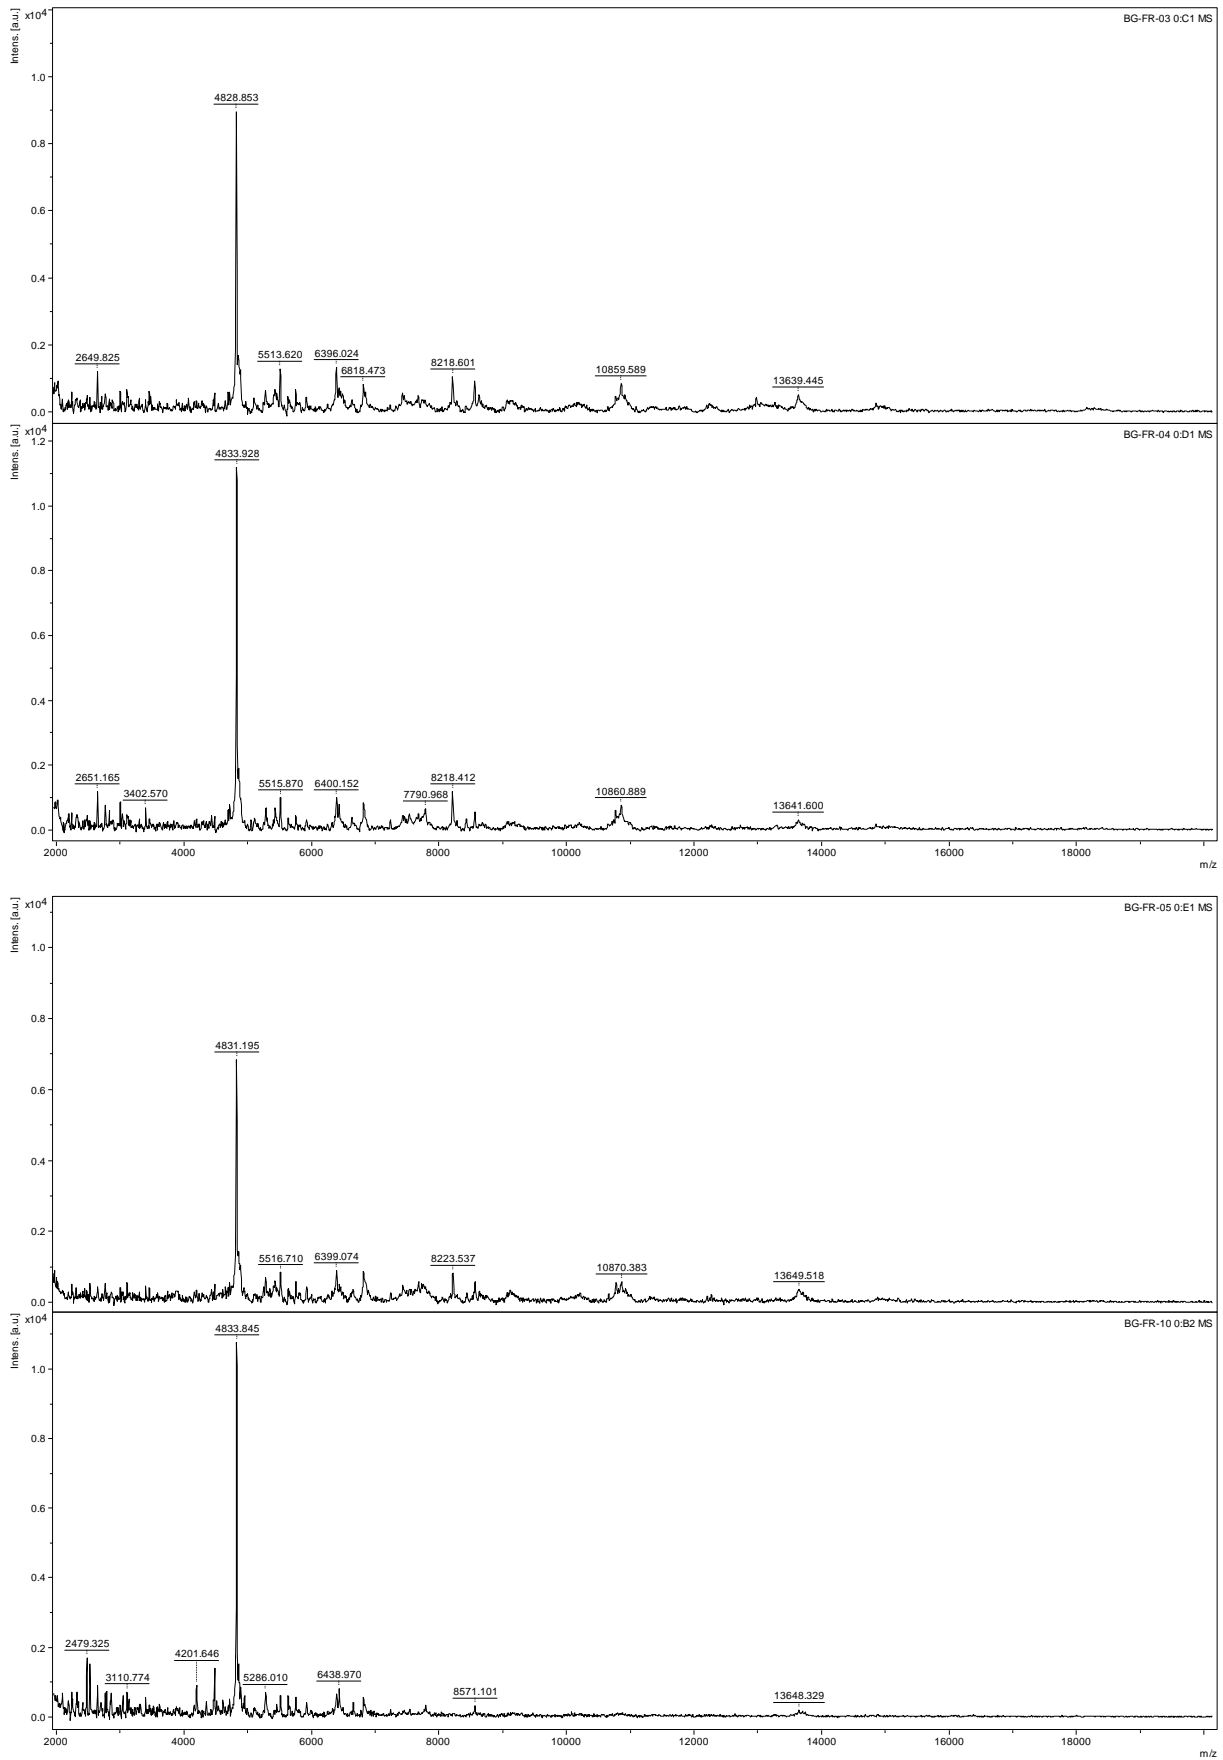

# B

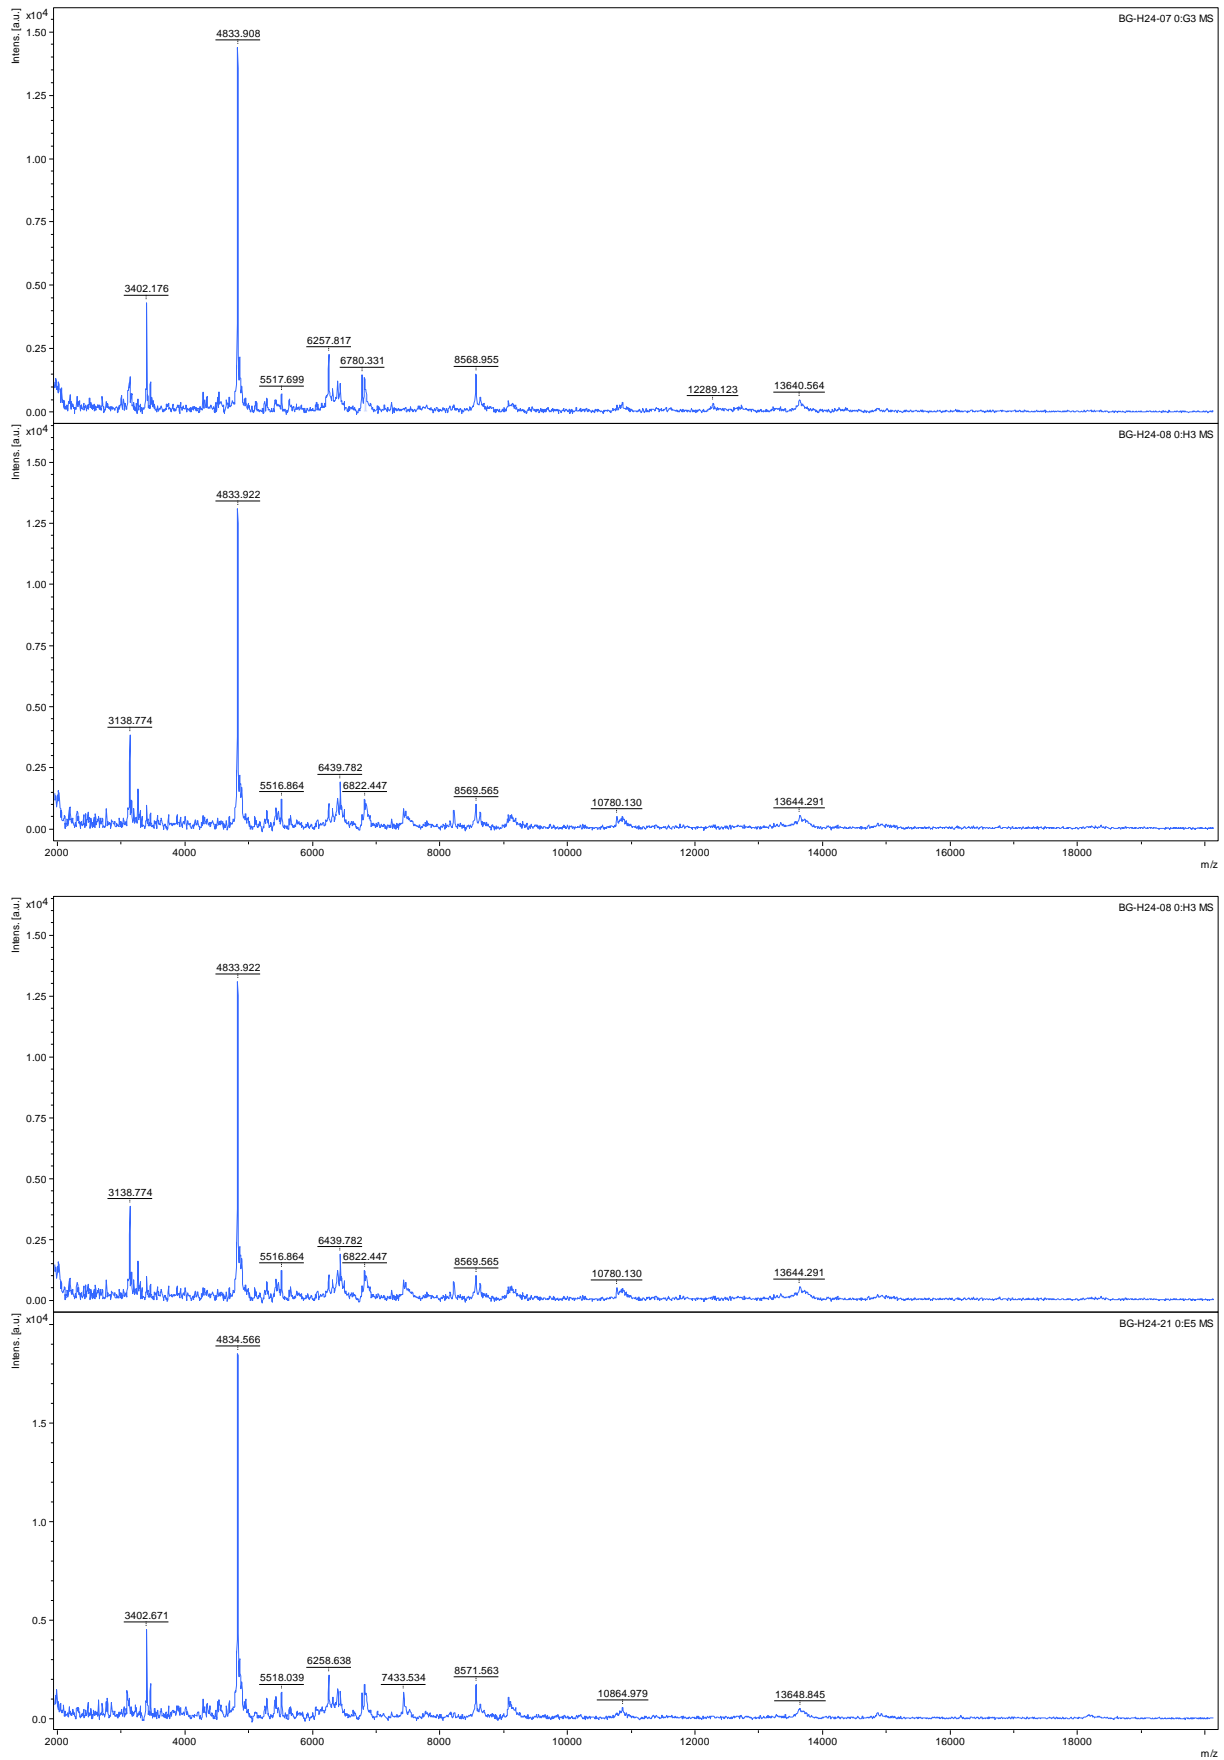

C

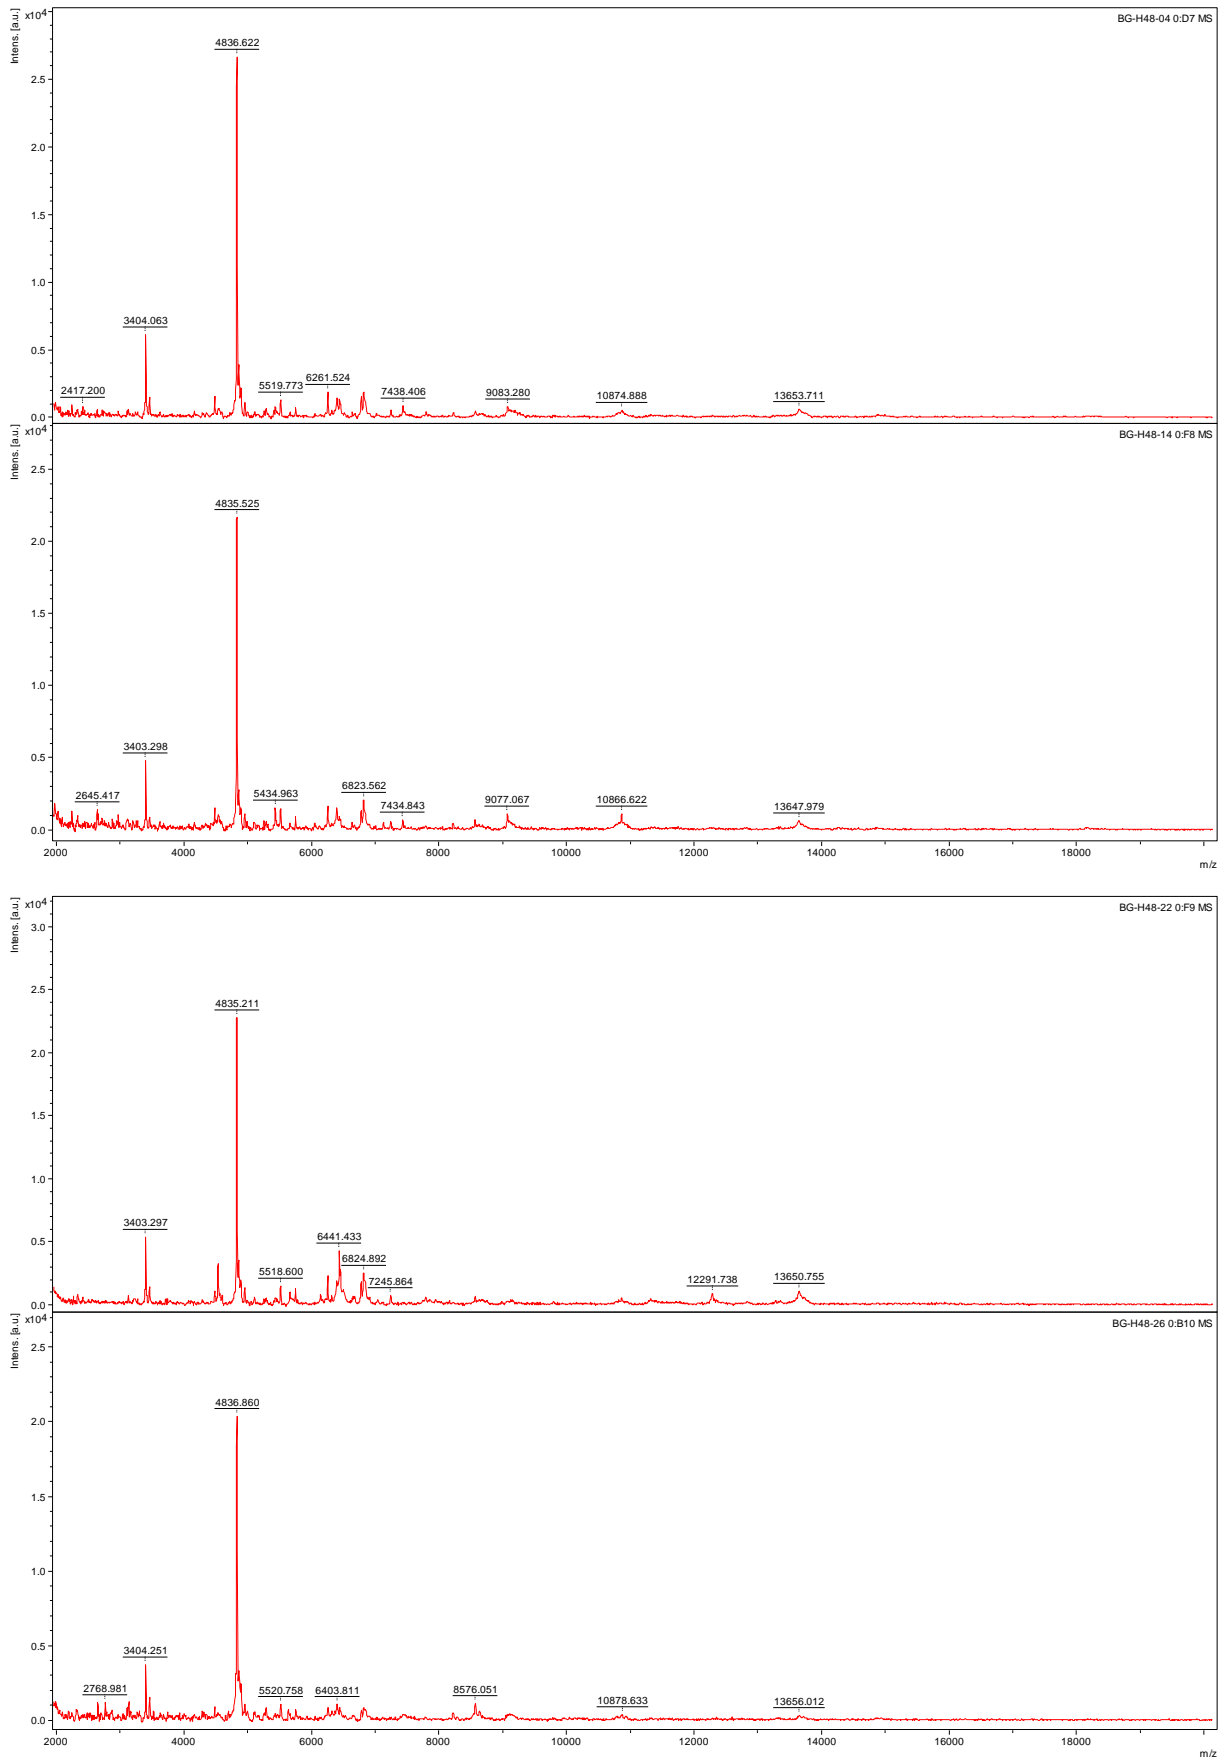

**D**

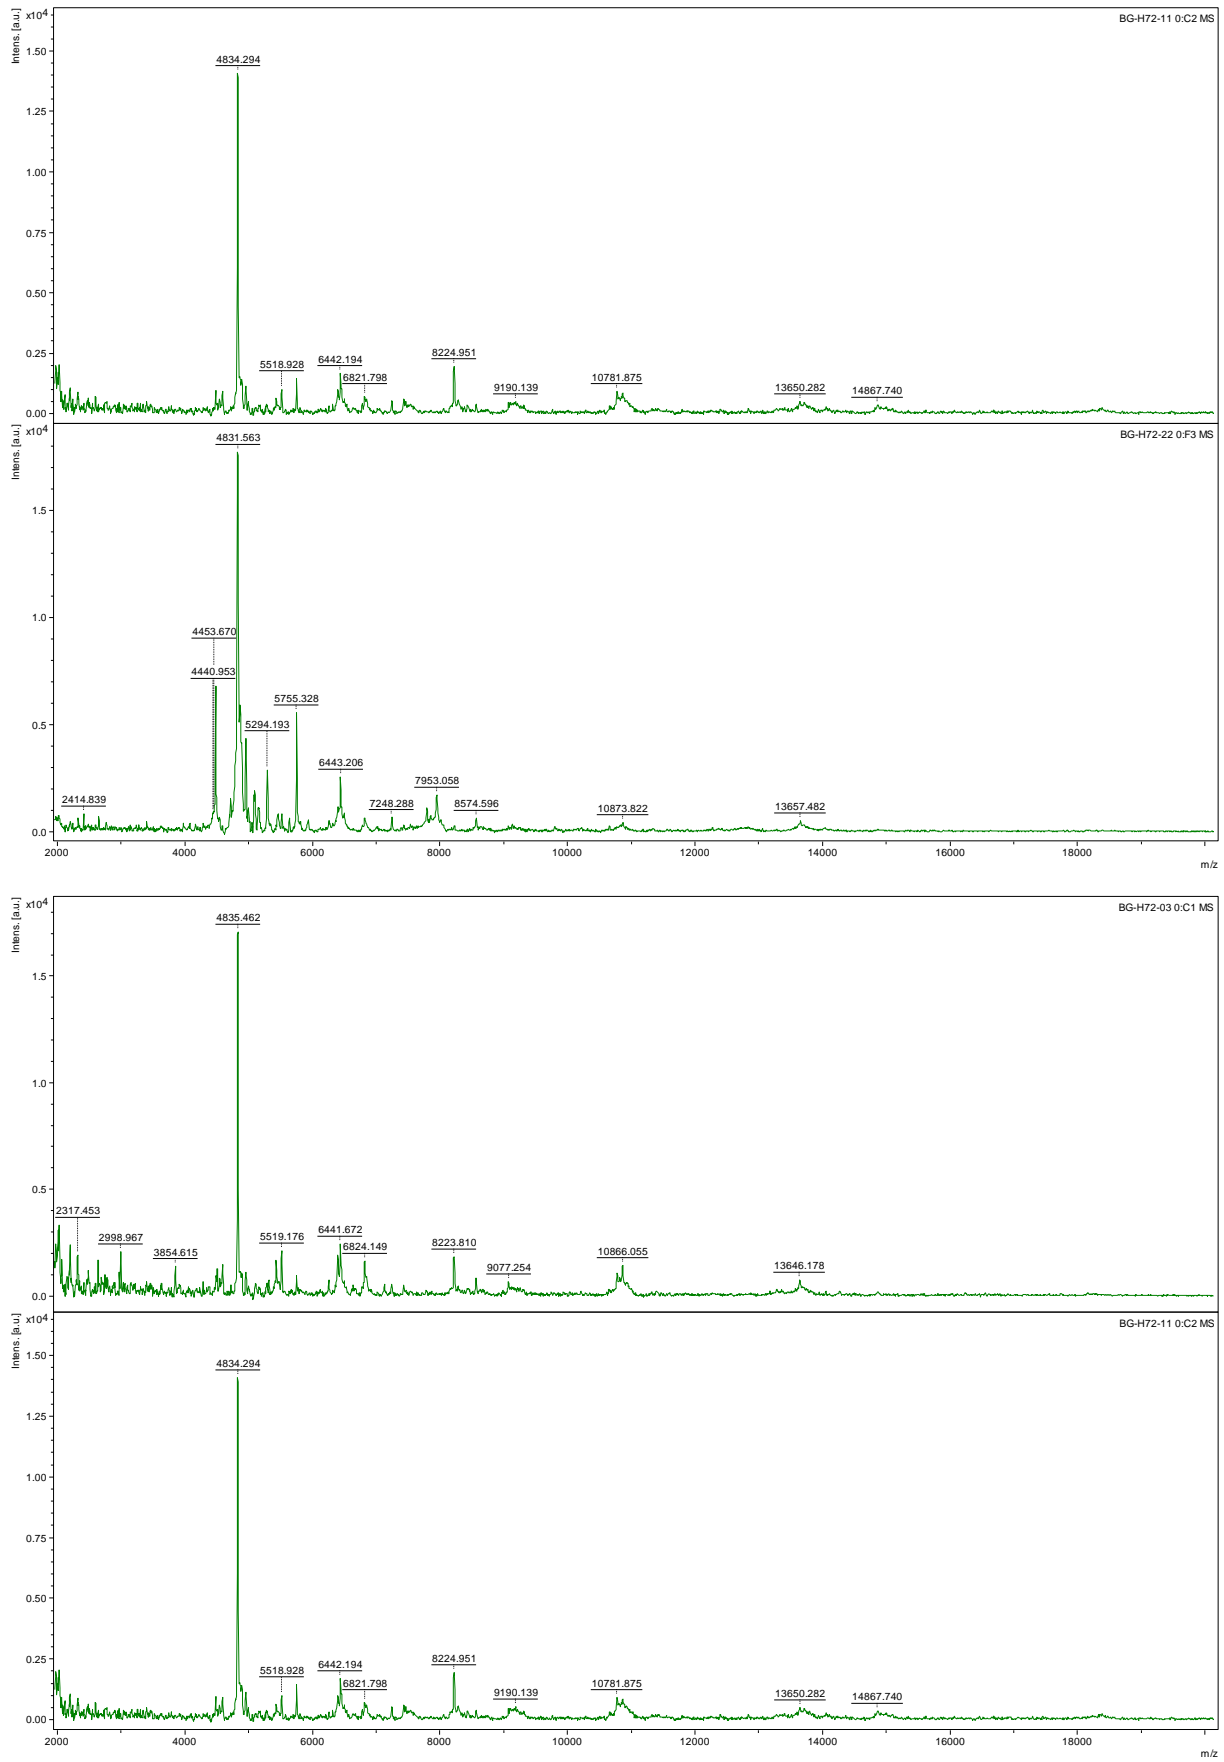

# E

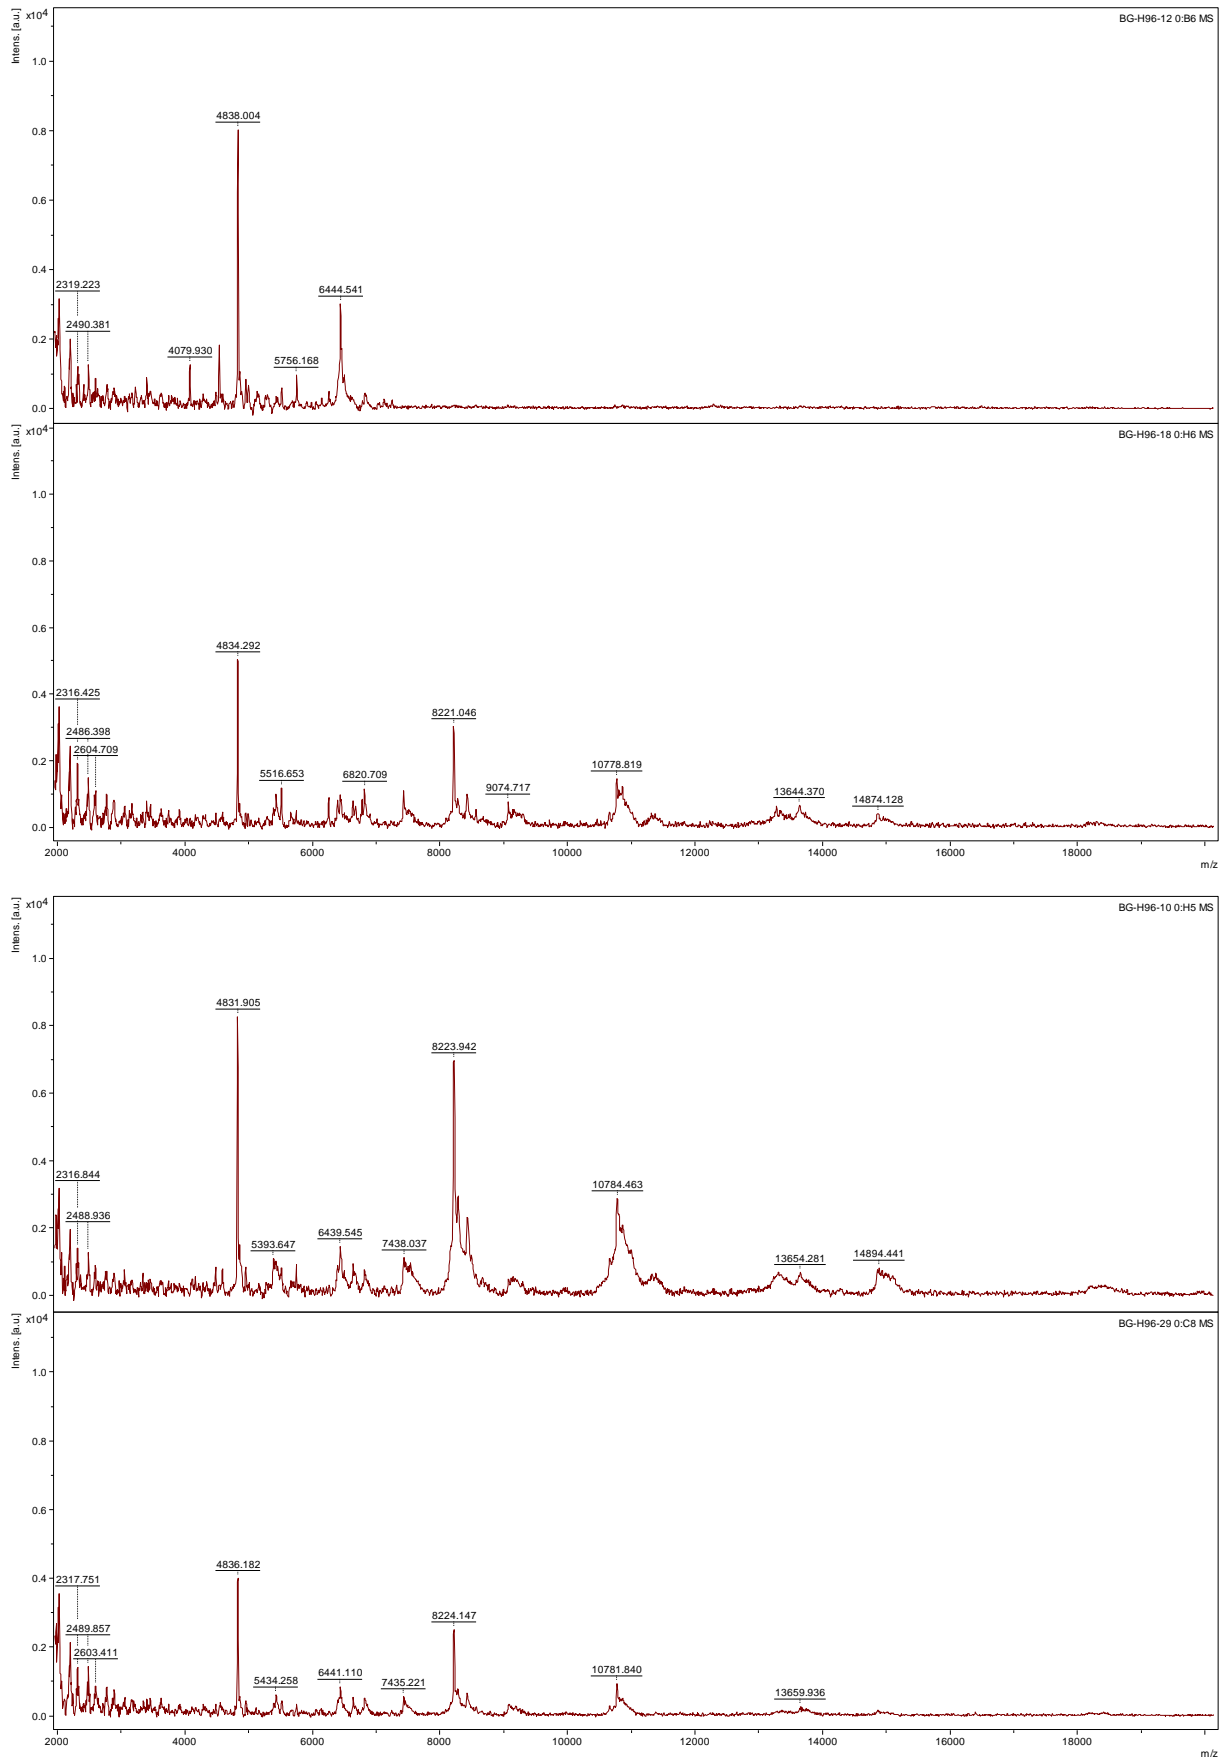

**F**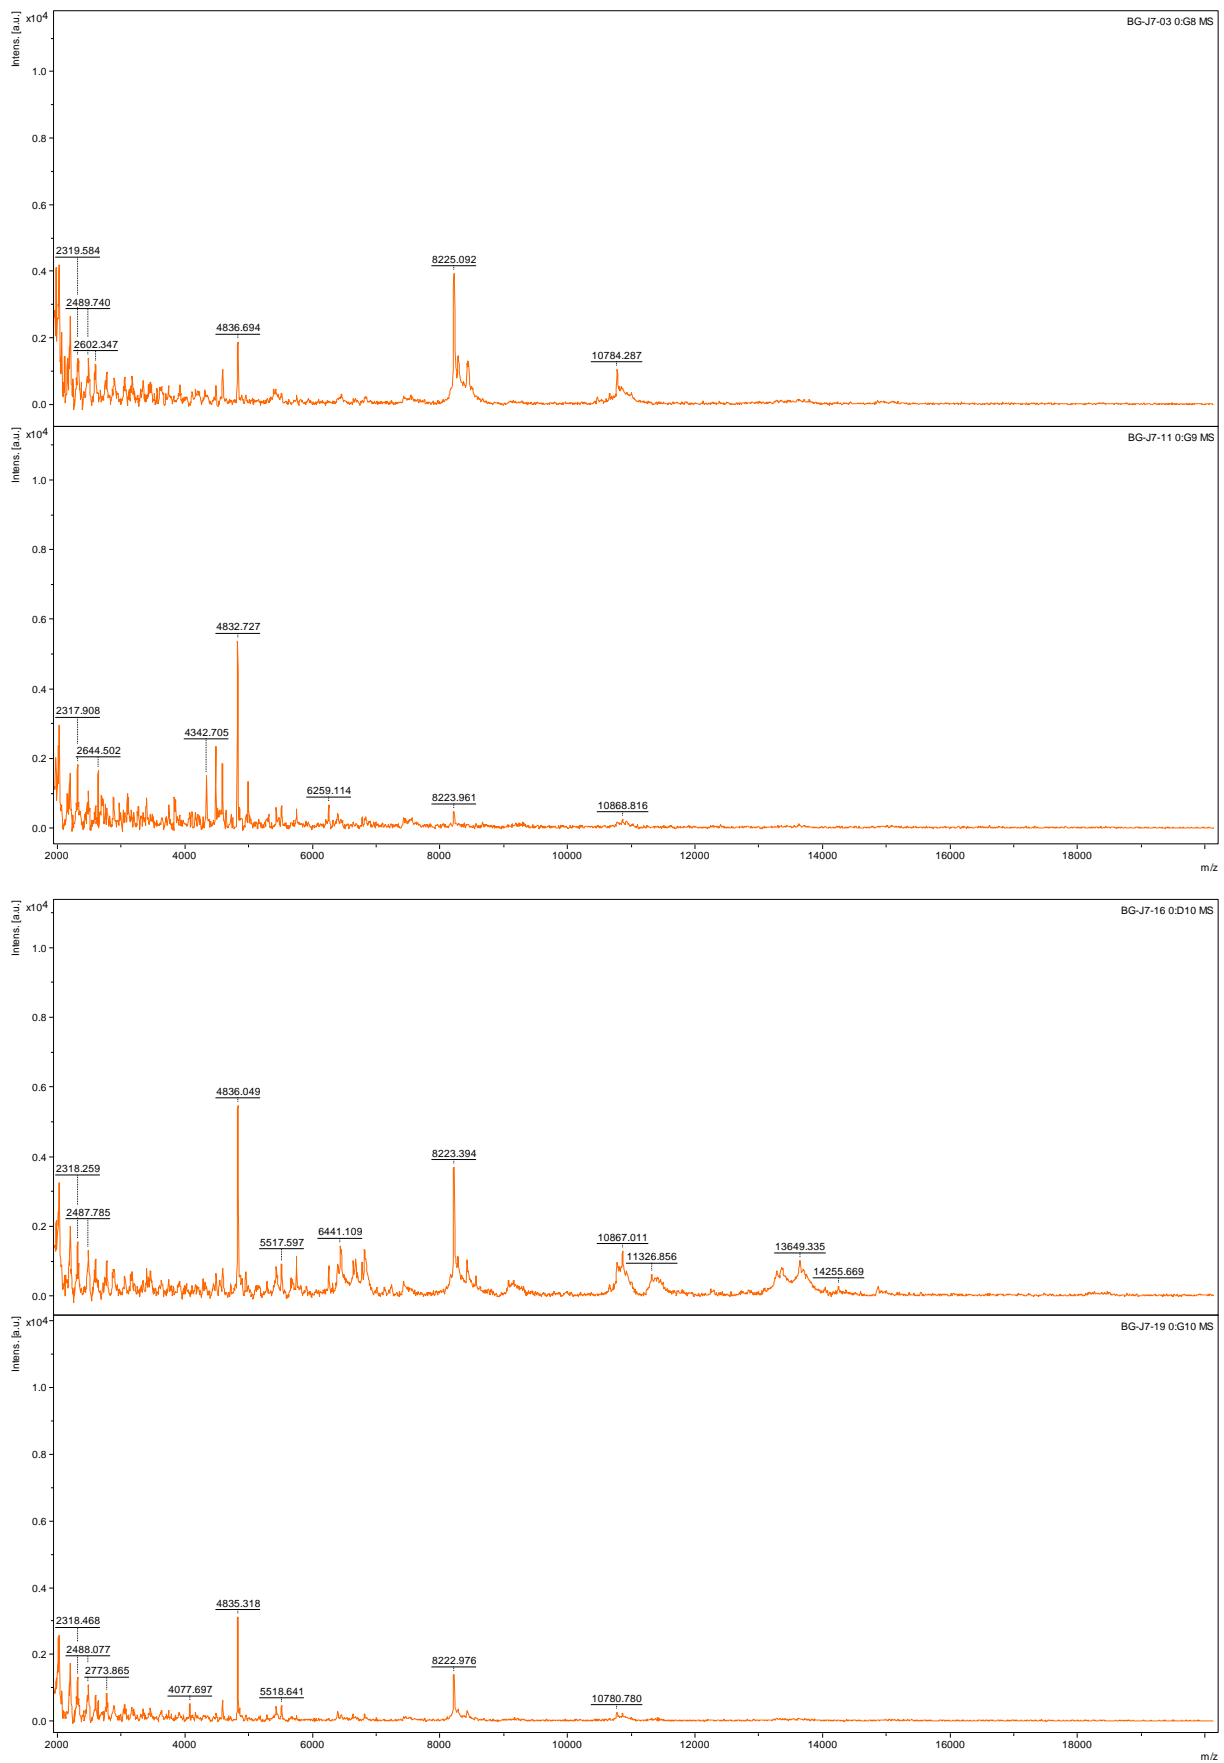

Supplement: 13071_2020_4234_MOESM1_ESM.pdf [file 13071_2020_4234_MOESM1_ESM.pdf]
