# Supplementary material for: MALDI-TOF MS: optimization for future uses in entomological surveillance and identification of mosquitoes from New Caledonia
Source: PubMed Central journal article supplement (PMC7372833; doi:10.1186/s13071-020-04234-8), 2020-07-20

**Additional file 2: Figure S2.** MSP dendrogram of all the mosquitoes included in the New Caledonian MALDI-TOF database ( $n = 67$ ). The dendrogram was created using Biotyper v3.0 software. Distance units correspond to the relative similarity of MS spectra. Distance levels under 500 correspond to a reliable classification to species level.

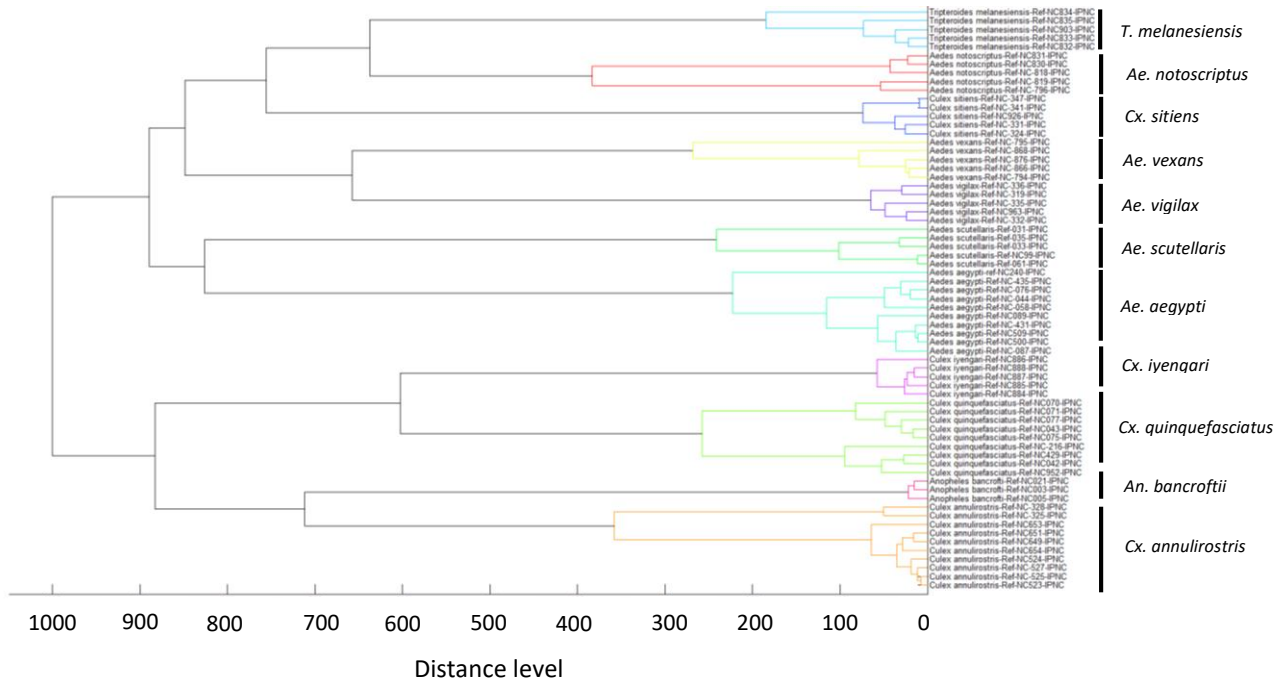

Supplement: 13071_2020_4234_MOESM2_ESM.pdf [file 13071_2020_4234_MOESM2_ESM.pdf]
