# Supplementary material for: MALDI-TOF MS: optimization for future uses in entomological surveillance and identification of mosquitoes from New Caledonia
Source: PubMed Central journal article supplement (PMC7372833; doi:10.1186/s13071-020-04234-8), 2020-07-20

**Additional file 4: Figure S4.** Impact of preservation duration on *Ae. aegypti* identification scores. Comparison of mosquitoes preserved in 70% ethanol ( $n = 18$  to 30 per point) with one MSP created from a specimen preserved in ethanol for one day (**a**). Comparison of frozen mosquitoes ( $n = 30$  per point) with one MSP created from a specimen preserved at  $-20\text{ }^{\circ}\text{C}$  for one day (**b**). Comparison of mosquito preserved in silica gel and cotton at room temperature ( $n = 20$  to 30 per point) with one MSP created from a specimen preserved silica gel and cotton for one day (**c**). X-axis corresponds to preservation duration. Y-axis corresponds to log-score values (LSVs) obtained. Wilcoxon test,  $**P < 0.01$ ,  $***P < 0.001$ . Abbreviation: NS, not significant.

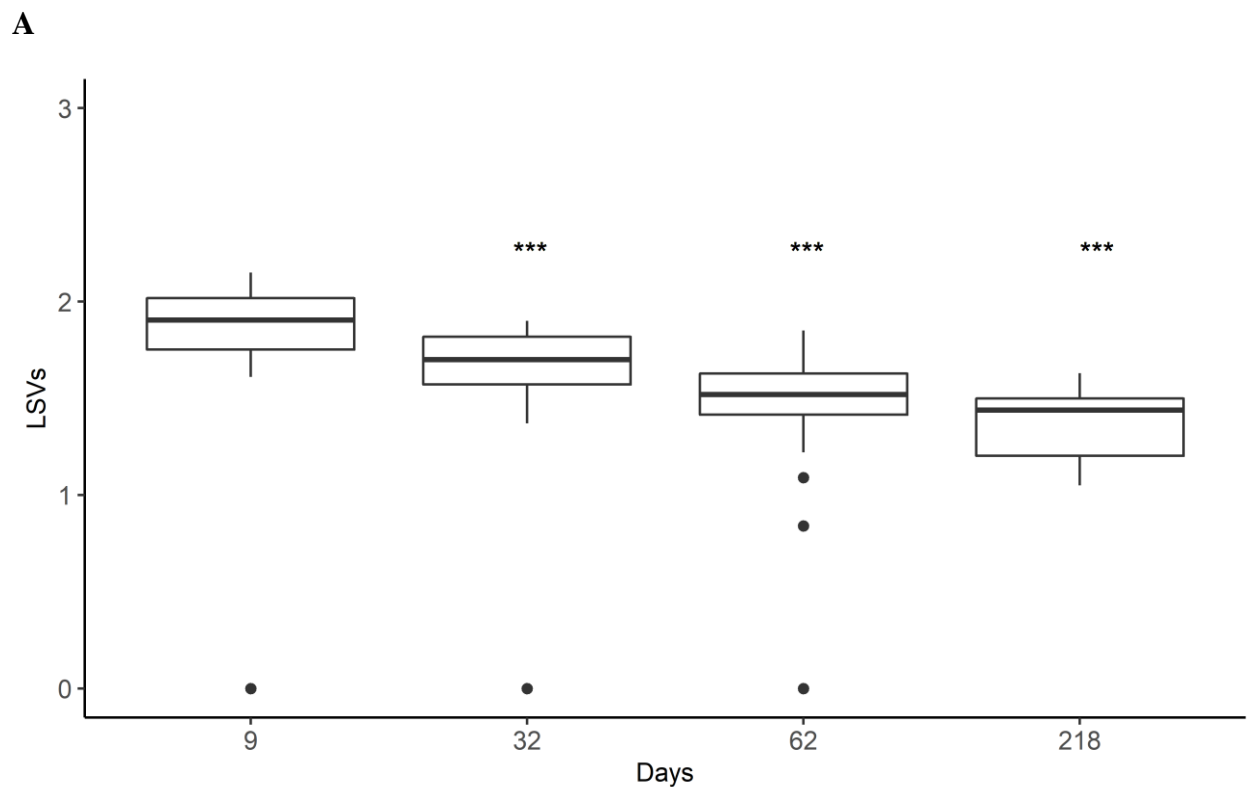

**B**

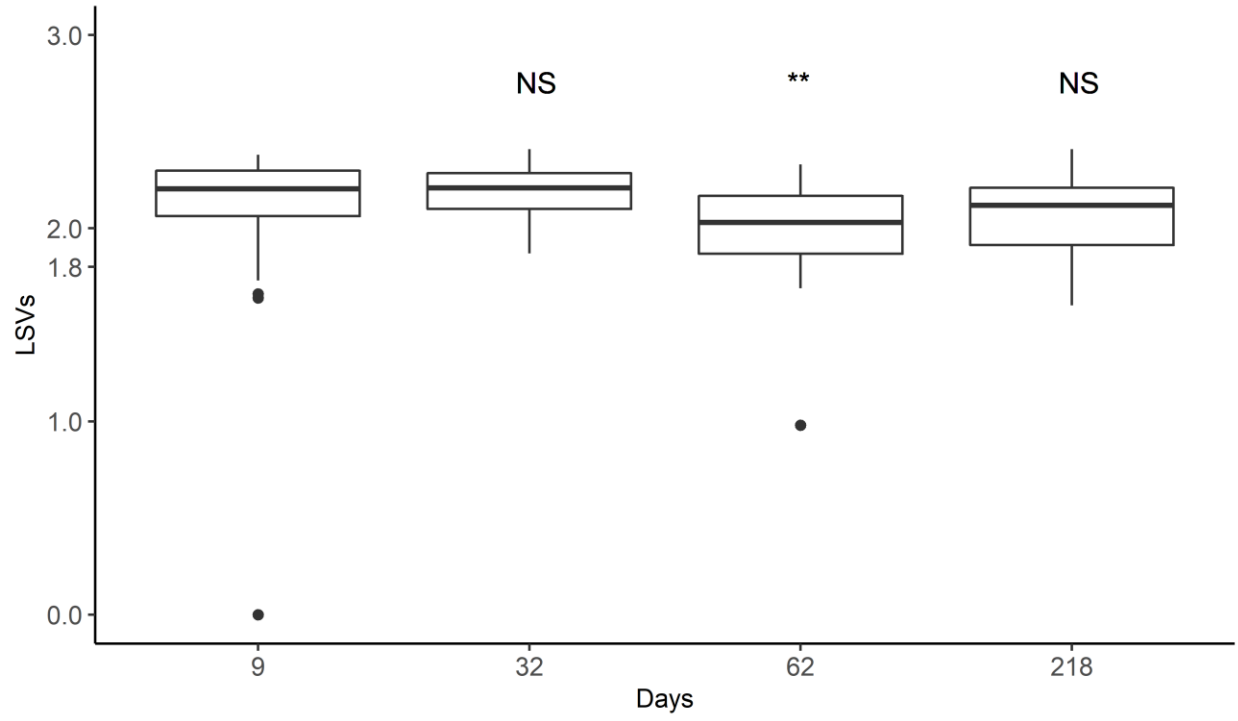

**C**

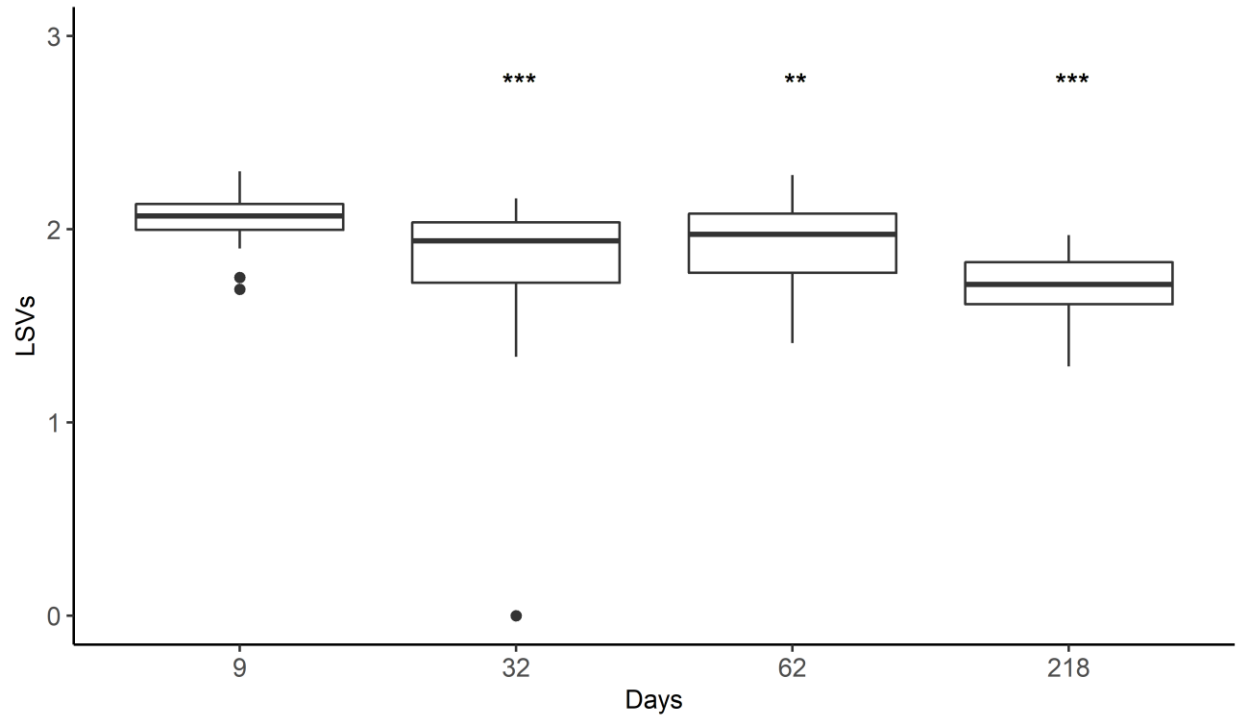

Supplement: 13071_2020_4234_MOESM4_ESM.pdf [file 13071_2020_4234_MOESM4_ESM.pdf]
