# Supplementary material for: MALDI-TOF MS: optimization for future uses in entomological surveillance and identification of mosquitoes from New Caledonia
Source: PubMed Central journal article supplement (PMC7372833; doi:10.1186/s13071-020-04234-8), 2020-07-20

**Additional file 5: Figure S5.** Comparison of LSVs of *Ae. aegypti* collected in 2015 and preserved for four years at -80 °C ( $n = 20$ ) and LSVs of *Ae. aegypti* collected in 2018 and analyzed no later than five months following sampling ( $n = 30$ ). All mosquitoes collected in 2018 were preserved at -20 °C or at -80 °C if preservation exceeded three weeks before MALDI-TOF MS analysis. Spectra obtained with all these mosquitoes were compared to MSPs created from fresh field-collected specimens in the database. Correct identification was achieved with high LSVs. On the graph, colors illustrate MALDI-TOF MS identification, the red dashed line marks the threshold value of 1.8 and the green lines illustrate LSV median for each group.

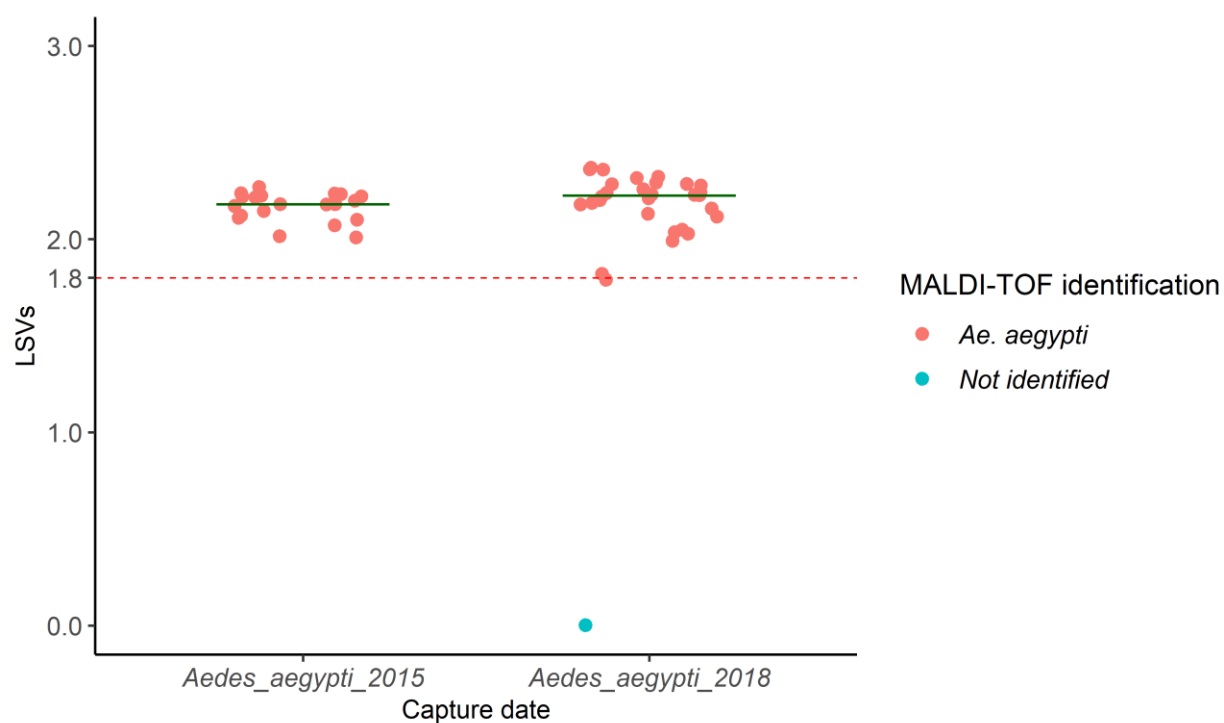

Supplement: 13071_2020_4234_MOESM5_ESM.pdf [file 13071_2020_4234_MOESM5_ESM.pdf]
