# Supplementary material for: MALDI-TOF MS: optimization for future uses in entomological surveillance and identification of mosquitoes from New Caledonia
Source: PubMed Central journal article supplement (PMC7372833; doi:10.1186/s13071-020-04234-8), 2020-07-20

**Additional file 6: Figure S6.** Comparison of log-score values according to number of spots per sample. Analysis was performed using *Ae. aegypti* from the field ( $n = 29$ ) which were compared with MSPs in the database. The red dashed line marks the threshold value of 1.8. Wilcoxon test,  $**P < 0.01$ . Abbreviations: NS, not significant; LSVs, log-score values.

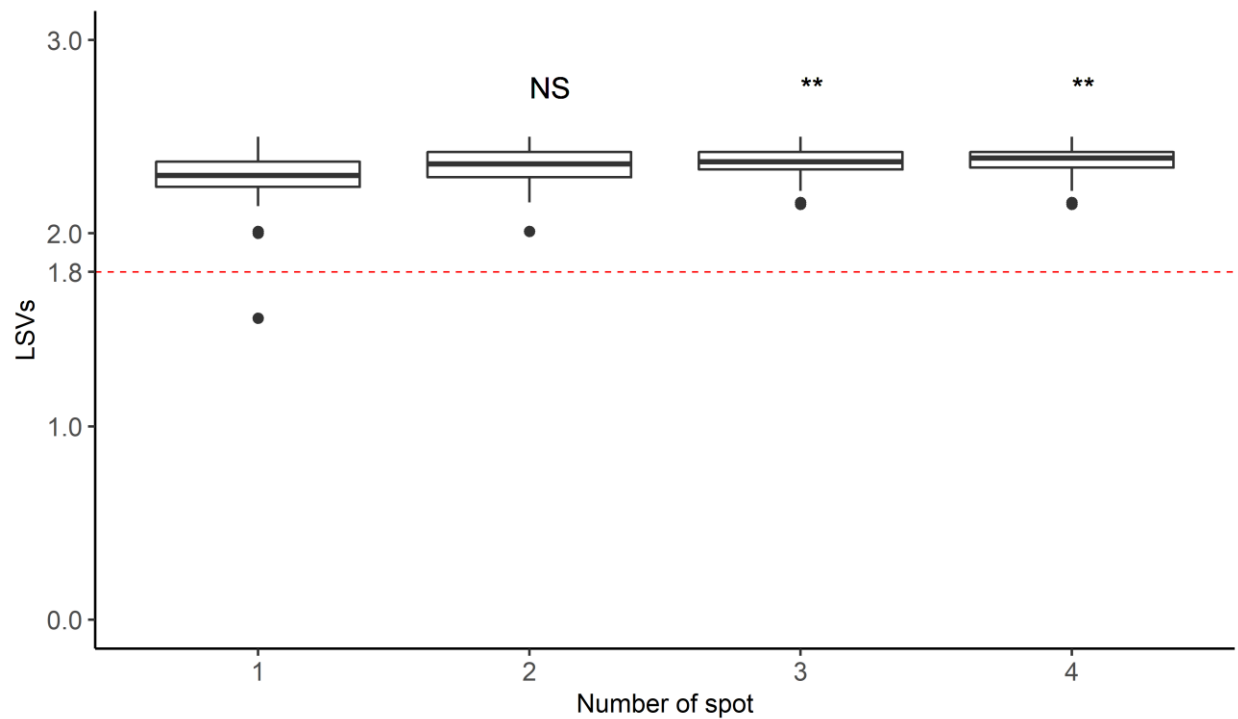

Supplement: 13071_2020_4234_MOESM6_ESM.pdf [file 13071_2020_4234_MOESM6_ESM.pdf]
